# Supplementary material for: Tuning solid-state fluorescence of pyrene derivatives via a cocrystal strategy
Source: Royal Society of Chemistry journal article supplement (doi:10.1039/c3ce27102a), 2013-01-01
Supplement: c3ce27102a.pdf [file c3ce27102a.pdf]

## Supporting information

### Determination methods

$^1\text{H}$  NMR and  $^{13}\text{C}$  NMR spectra were recorded at 297 K on a Bruker Avance 300 or 500 MHz NMR spectrometers using  $\text{CDCl}_3$  as solvent and TMS as internal standard. Infrared spectra were obtained with a Bruker Tensor 27 FT-IR spectrometer. Differential scanning calorimetry (DSC) patterns and thermogravimetric analysis (TGA) patterns were recorded with a Mettler-Toledo TGA/DSC 1 Thermogravimetric Analyzer with the temperature scanned from 50 to 300 °C at 10 °C /min. Fluorescence microscopy images were obtained on Olympus BX51 imaging system excited at 365 nm. UV-Vis absorption spectra were recorded on a Shimadzu UV-3600 spectrometer. Fluorescence spectra were obtained on a Horiba FluoroMax 4 spectrofluorometer. Solid fluorescent quantum yields were performed using Quanta- $\phi$  accessory with excitation wavelength at 320 nm. Elemental analysis was carried out on Vario MICRO.

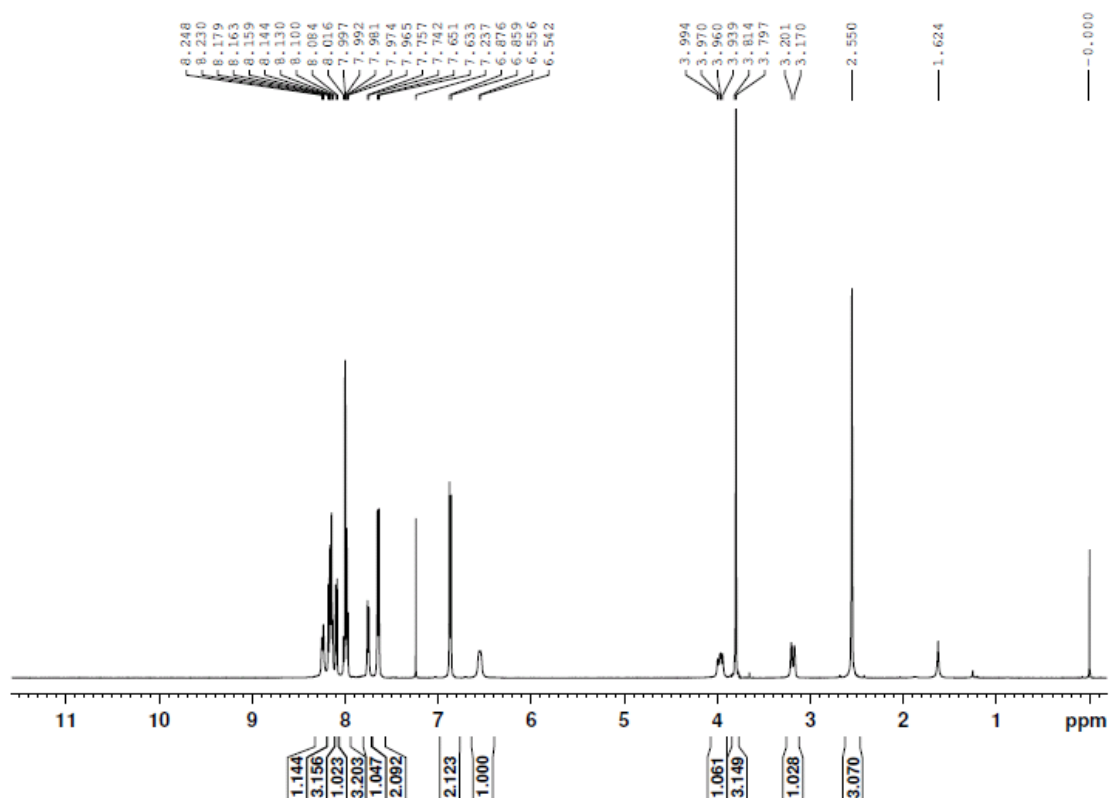

**Figure 1S.**  $^1\text{H}$  NMR spectrum of AMPP.

Assignments of each H in the NMR spectrum of AMPP:  $\delta$  (ppm) 2.55 (CO- $\text{CH}_3$ ), 3.17-3.20 (one H of  $\text{CH}_2$ ), 3.80-3.81 ( $-\text{OCH}_3$ ), 3.94-3.99 (another H of  $\text{CH}_2$ ), 6.54-6.56 (CH), 6.86-8.25 (13H, Ar-H from pyrene and benzene rings).

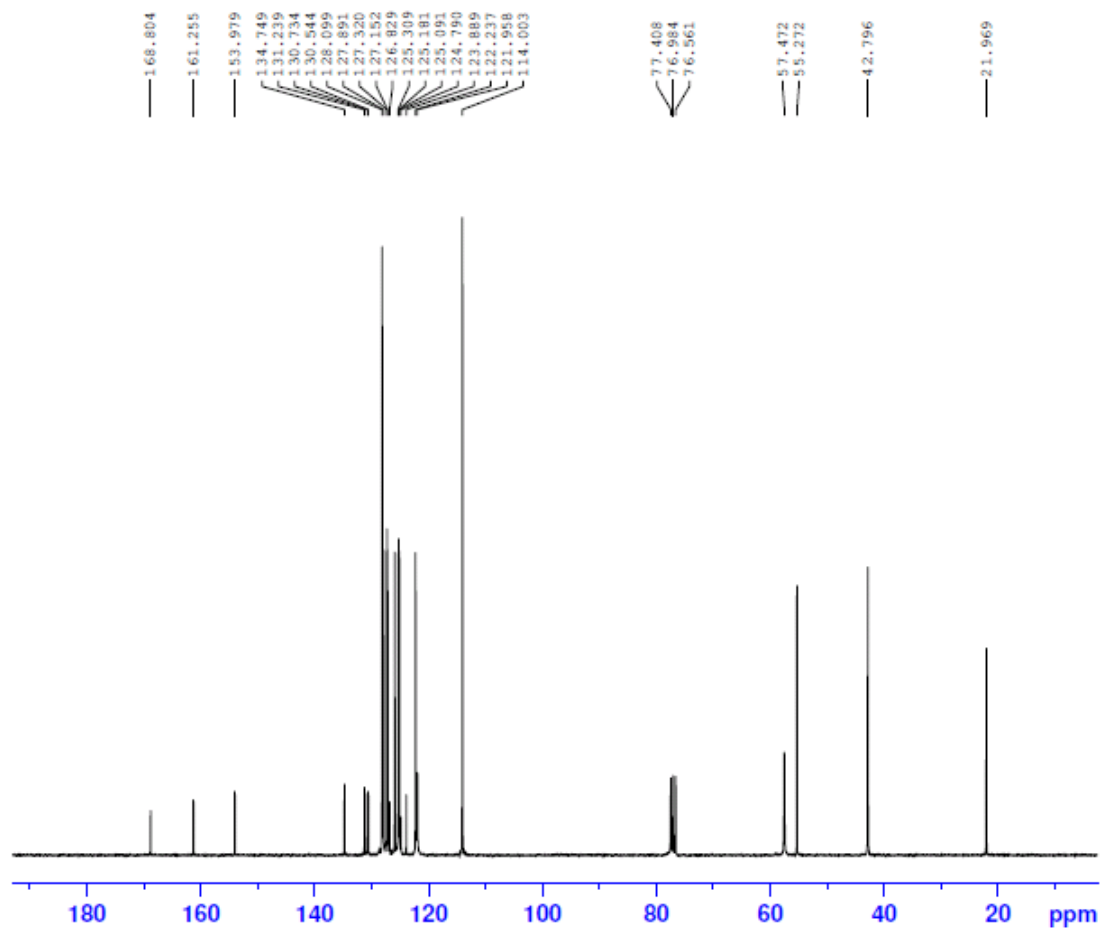

**Figure 2S.** <sup>13</sup>C NMR spectrum of AMPP.

Assignments of C in the NMR spectrum of AMPP:  $\delta$  (ppm) 21.97 (C\*-CO), 42.79 (CH<sub>2</sub>), 55.27 (-OCH<sub>3</sub>), 57.47 (CH-N), 114.00-134.75 (the rest Ar-C from pyrene and benzene rings), 153.98 (C=N), 161.26 (C\*-OCH<sub>3</sub>), 168.80 (C=O). (21.97 and 161.26 are assigned to the two C\* respectively).

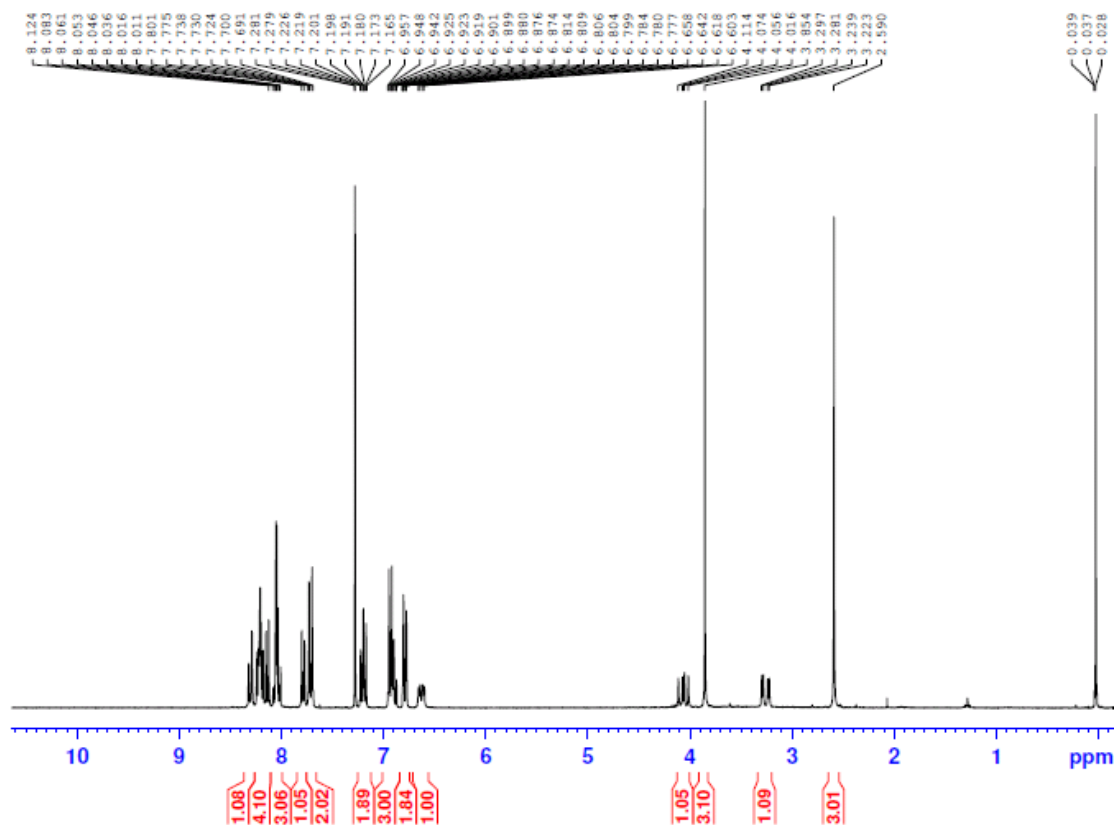

Figure 3S.  $^1\text{H}$  NMR spectrum of AMPP-phenol cocrystal.

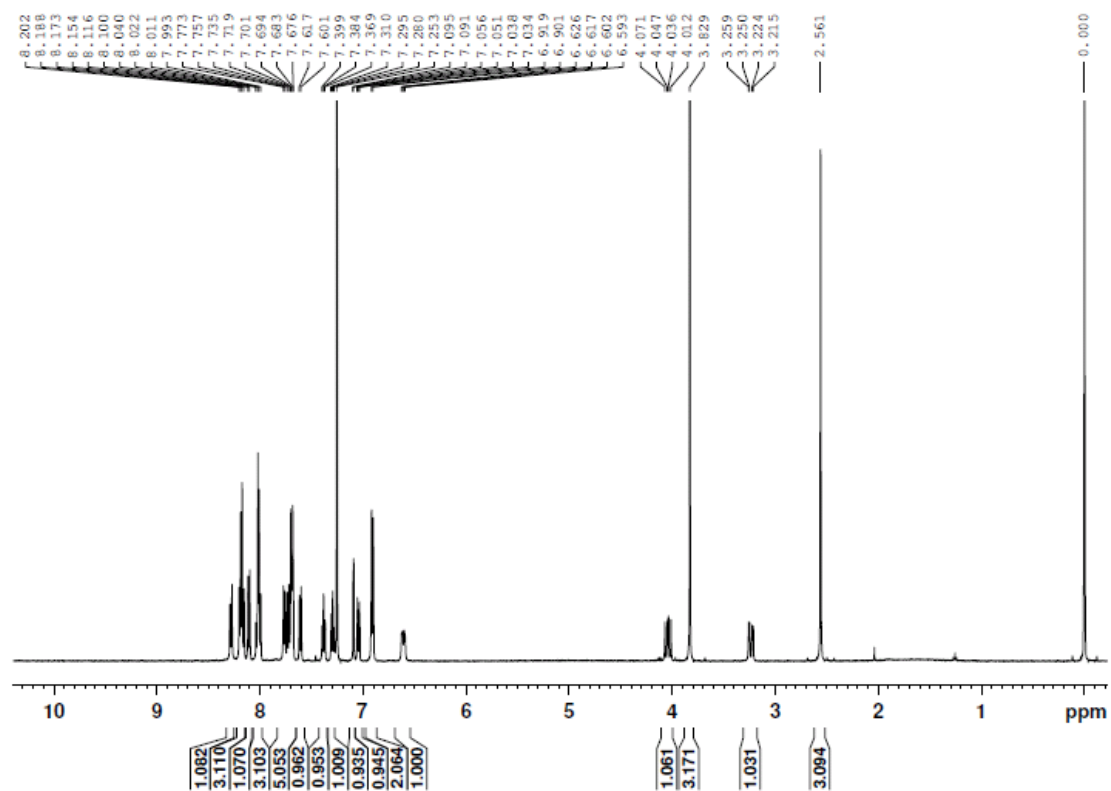

Figure 4S.  $^1\text{H}$  NMR spectrum of AMPP-(2-naphthol) cocrystal.

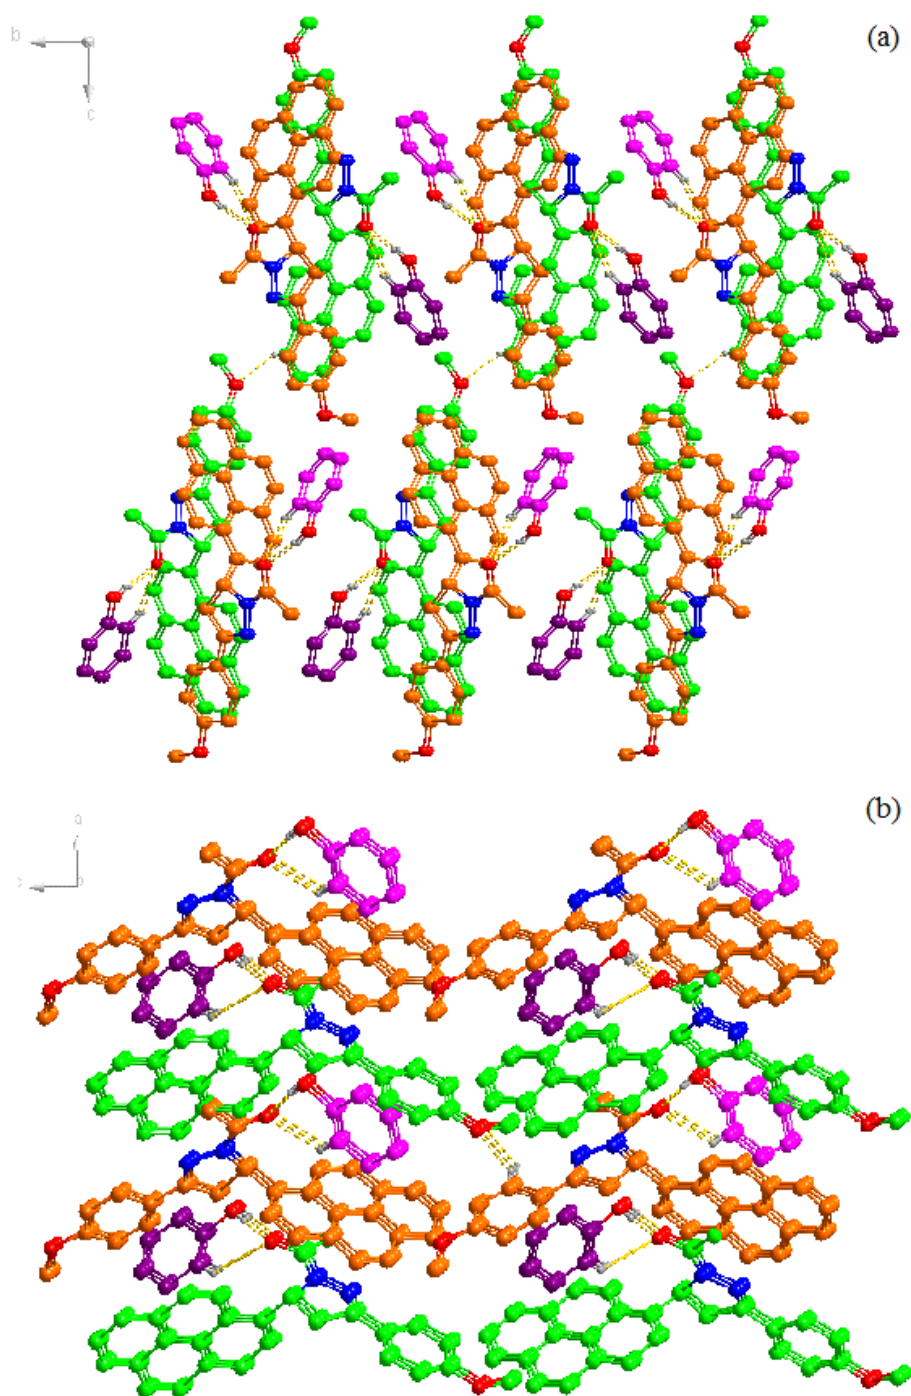

**Figure 5S.** The hydrogen bonding networks constructed by AMPP and phenol molecules in crystal II, hydrogen bonds are presented by dashed lines. (a) view along the *bc* plane (b) view along the *ac* plane. Partial hydrogen atoms not participating in the interactions have been omitted for clarity.

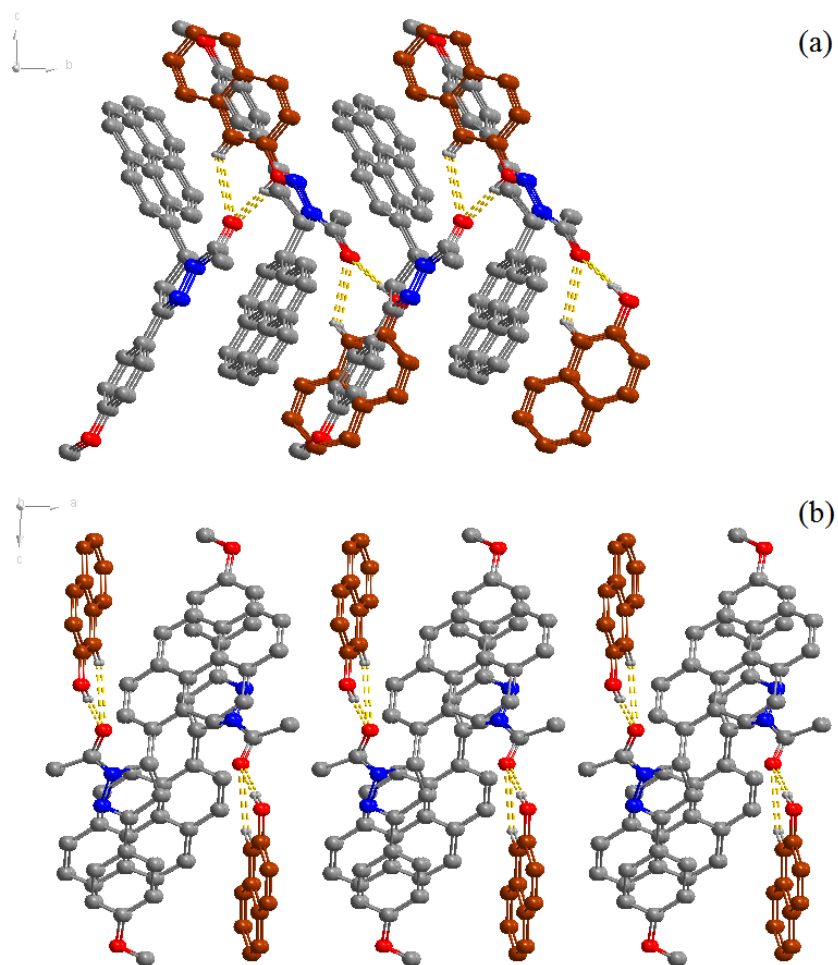

**Figure 6S.** The hydrogen bonding networks constructed by AMPP and 2-naphthol molecules in crystal III, hydrogen bonds are presented by dashed lines. (a) view along the *bc* plane (b) view along the *ac* plane. Partial hydrogen atoms not participating in the interactions have been omitted for clarity.

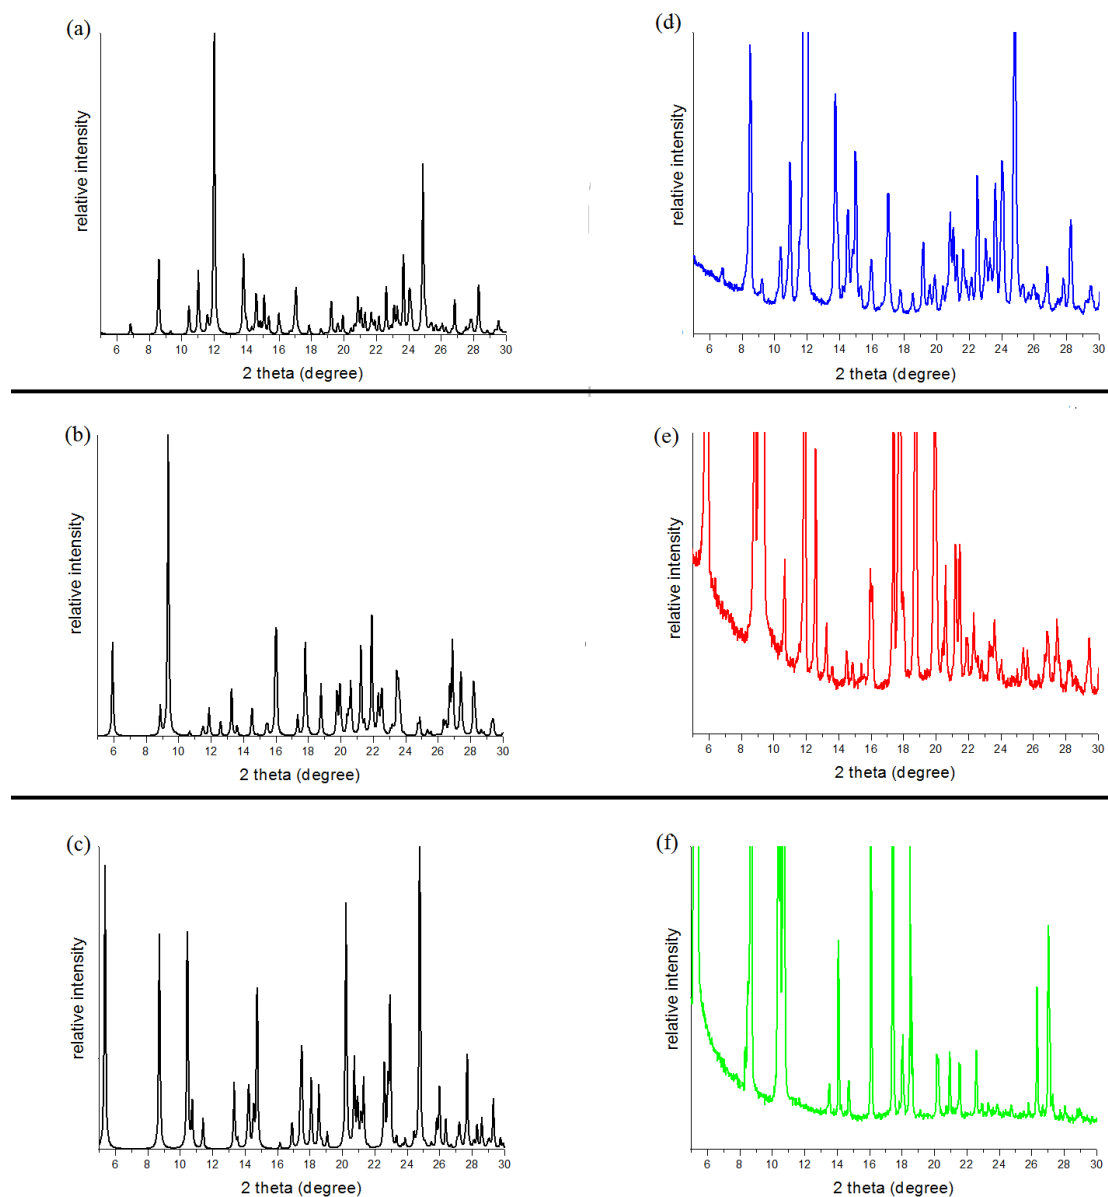

**Figure 7S.** The simulated PXRD patterns of crystals I (a), II (b) and III (c) and the partial magnified observed PXRD patterns of crystals I (d), II (e) and III (f).

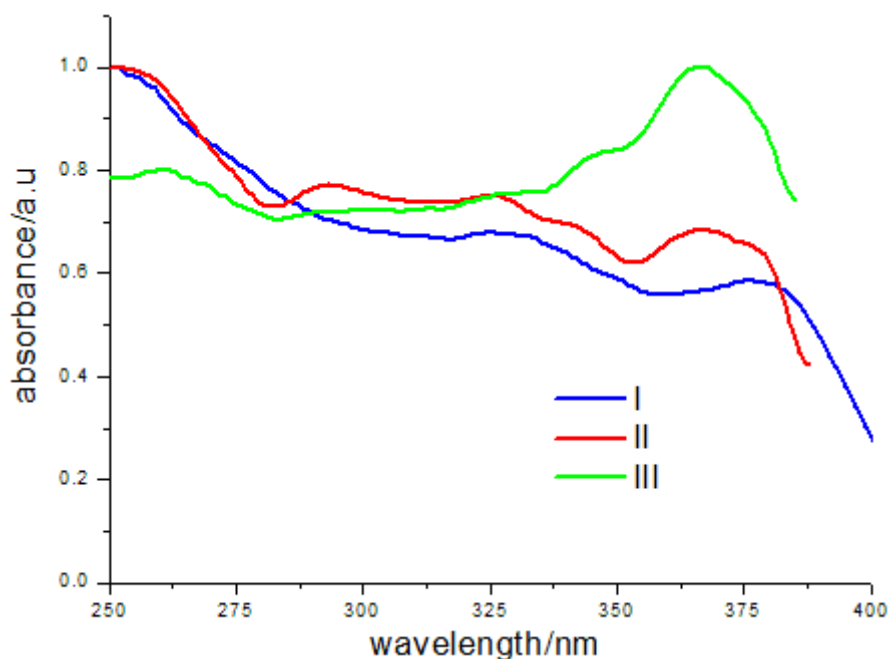

Figure 8S. Excitation spectra for the three crystals.

Table 1S. Hydrogen bonds parameters in crystals I-III

| D-H...A       | D-H(Å) | H...A(Å) | D...A(Å) | ∠D-H...A (°) |
|---------------|--------|----------|----------|--------------|
| I             |        |          |          |              |
| C22-H22...O4  | 0.930  | 2.655    | 3.520    | 155.00       |
| C23-H23...O4  | 0.980  | 2.668    | 3.581    | 155.22       |
| C39-H39...O3  | 0.929  | 2.719    | 3.604    | 159.46       |
| II            |        |          |          |              |
| O3-H3A...O4   | 0.821  | 1.922    | 2.793    | 173.11       |
| C30-H30A...O4 | 0.930  | 2.576    | 3.275    | 132.29       |
| C57-H57A...O2 | 0.930  | 2.613    | 3.425    | 146.29       |
| O6-H6A...O1   | 0.821  | 1.856    | 2.677    | 179.44       |
| C68-H68A...O1 | 0.930  | 2.584    | 3.285    | 132.47       |
| III           |        |          |          |              |
| O3-H3B...O1   | 0.820  | 1.840    | 2.659    | 178.84       |
| C38-H38A...O1 | 0.930  | 2.627    | 3.291    | 128.88       |

Table 2S. C-H...π interactions in crystals I-III

|                       | $d_{H-c}$ (Å) | ∠C-H...c(°) |
|-----------------------|---------------|-------------|
| I                     |               |             |
| C34-H34...Pyrene(B)   | 2.825         | 148.06      |
| C52-H52C...Pyrene (B) | 2.979         | 107.57      |
| C48-H48...Pyrene (A)  | 2.842         | 147.15      |
| C13-H13...Pyrene (B)  | 2.986         | 176.75      |
| II                    |               |             |
| C30-H30A...Pyrene (B) | 2.975         | 141.71      |
| C31-H31A...Pyrene (B) | 2.808         | 150.93      |
| C17-H17A...Pyrene (B) | 2.810         | 140.00      |
| C67-H67A...Pyrene (A) | 2.774         | 156.64      |
| C51-H51A...Pyrene (A) | 2.820         | 140.04      |
